# Supplementary material for: Anemia and hemodilution: analysis of a single center cohort based on 2,858 red cell mass measurements
Source: PubMed Central journal article supplement — Haematologica. 2021 Apr 1;106(4):1167–71. doi: 10.3324/haematol.2020.249409 (PMC8018104; doi:10.3324/haematol.2020.249409), 2021-04-01
Supplement: 2020_249409-DisclosuresContributions.pdf [file 2020_249409-DisclosuresContributions.pdf]

Haematologica  
HAEMATOL/2020/249409  
Version 3

Anemia and hemodilution: analysis of a single center cohort based on  
2858 Red Cell Mass measurements.

Louis Drevon, Nabih Maslah, Juliette Soret-Dulphy, Christine Dosquet,  
Oдно Ravdan, Laetitia Vercellino, Célia Belkhodja, Nathalie Parquet,  
Anne C. Brignier, Marie-Hélène Schlageter, Bruno Cassinat,  
Jean-Jacques Kiladjian, Christine Chomienne, and Stéphane Giraudier  
(Collaborative Groups: FIM, French Intergroup for Myeloproliferative  
disorders)

Disclosures: none

Contributions: LD, OR, JS, CC, CD, NP, AB, JJK and SG followed the patients, LD, CB and SG collected data, MHS, NM and BC performed biological analysis, LD, BC, JJK and SG analyzed the data and wrote the paper.
