# Supplementary material for: Anemia and hemodilution: analysis of a single center cohort based on 2,858 red cell mass measurements
Source: PubMed Central journal article supplement — Haematologica. 2021 Apr 1;106(4):1167–71. doi: 10.3324/haematol.2020.249409 (PMC8018104; doi:10.3324/haematol.2020.249409), 2021-04-01
Supplement: 2020_249409_DREVON_SUPPL.pdf [file 2020_249409_DREVON_SUPPL.pdf]

**Anemia and hemodilution: analysis of a single center cohort based on 2,858 red cell mass measurements**

Louis Drevon,<sup>1,2,3</sup> Nabih Maslah,<sup>1,2,3</sup> Juliette Soret-Dulphy,<sup>2,4</sup> Christine Dosquet,<sup>1,2,3</sup> Odno Ravdan,<sup>1</sup> Laetitia Vercellino,<sup>5</sup> Célia Belkhdja,<sup>1,2,3</sup> Nathalie Parquet,<sup>6</sup> Anne C. Brignier,<sup>6</sup> Marie-Hélène Schlageter,<sup>1,2,3</sup> Bruno Cassinat,<sup>1,2,3</sup> Jean-Jacques Kiladjian,<sup>2,3,4</sup> Christine Chomienne<sup>1,2,3</sup> and Stéphane Giraudier<sup>1,2,3</sup>

<sup>1</sup>APHP, Service de Biologie Cellulaire, Hôpital Saint-Louis, F-75010 Paris; <sup>2</sup>France Intergroupe des Syndromes Myéloprolifératifs (FIM); <sup>3</sup>Université de Paris, U1131 INSERM, IRSL, F-75010 Paris; <sup>4</sup>APHP, Centre d'Investigations Cliniques, Hôpital Saint-Louis, F-75010 Paris; <sup>5</sup>APHP, Service de Médecine Nucléaire, Hôpital Saint-Louis, F-75010 Paris and <sup>6</sup>APHP, Service d'Aphérèse Thérapeutique, Hôpital Saint-Louis, F-75010 Paris, France

Correspondence: STEPHANE GIRAUDIER - [stephane.giraudier@aphp.fr](mailto:stephane.giraudier@aphp.fr)

doi:10.3324/haematol.2020.249409

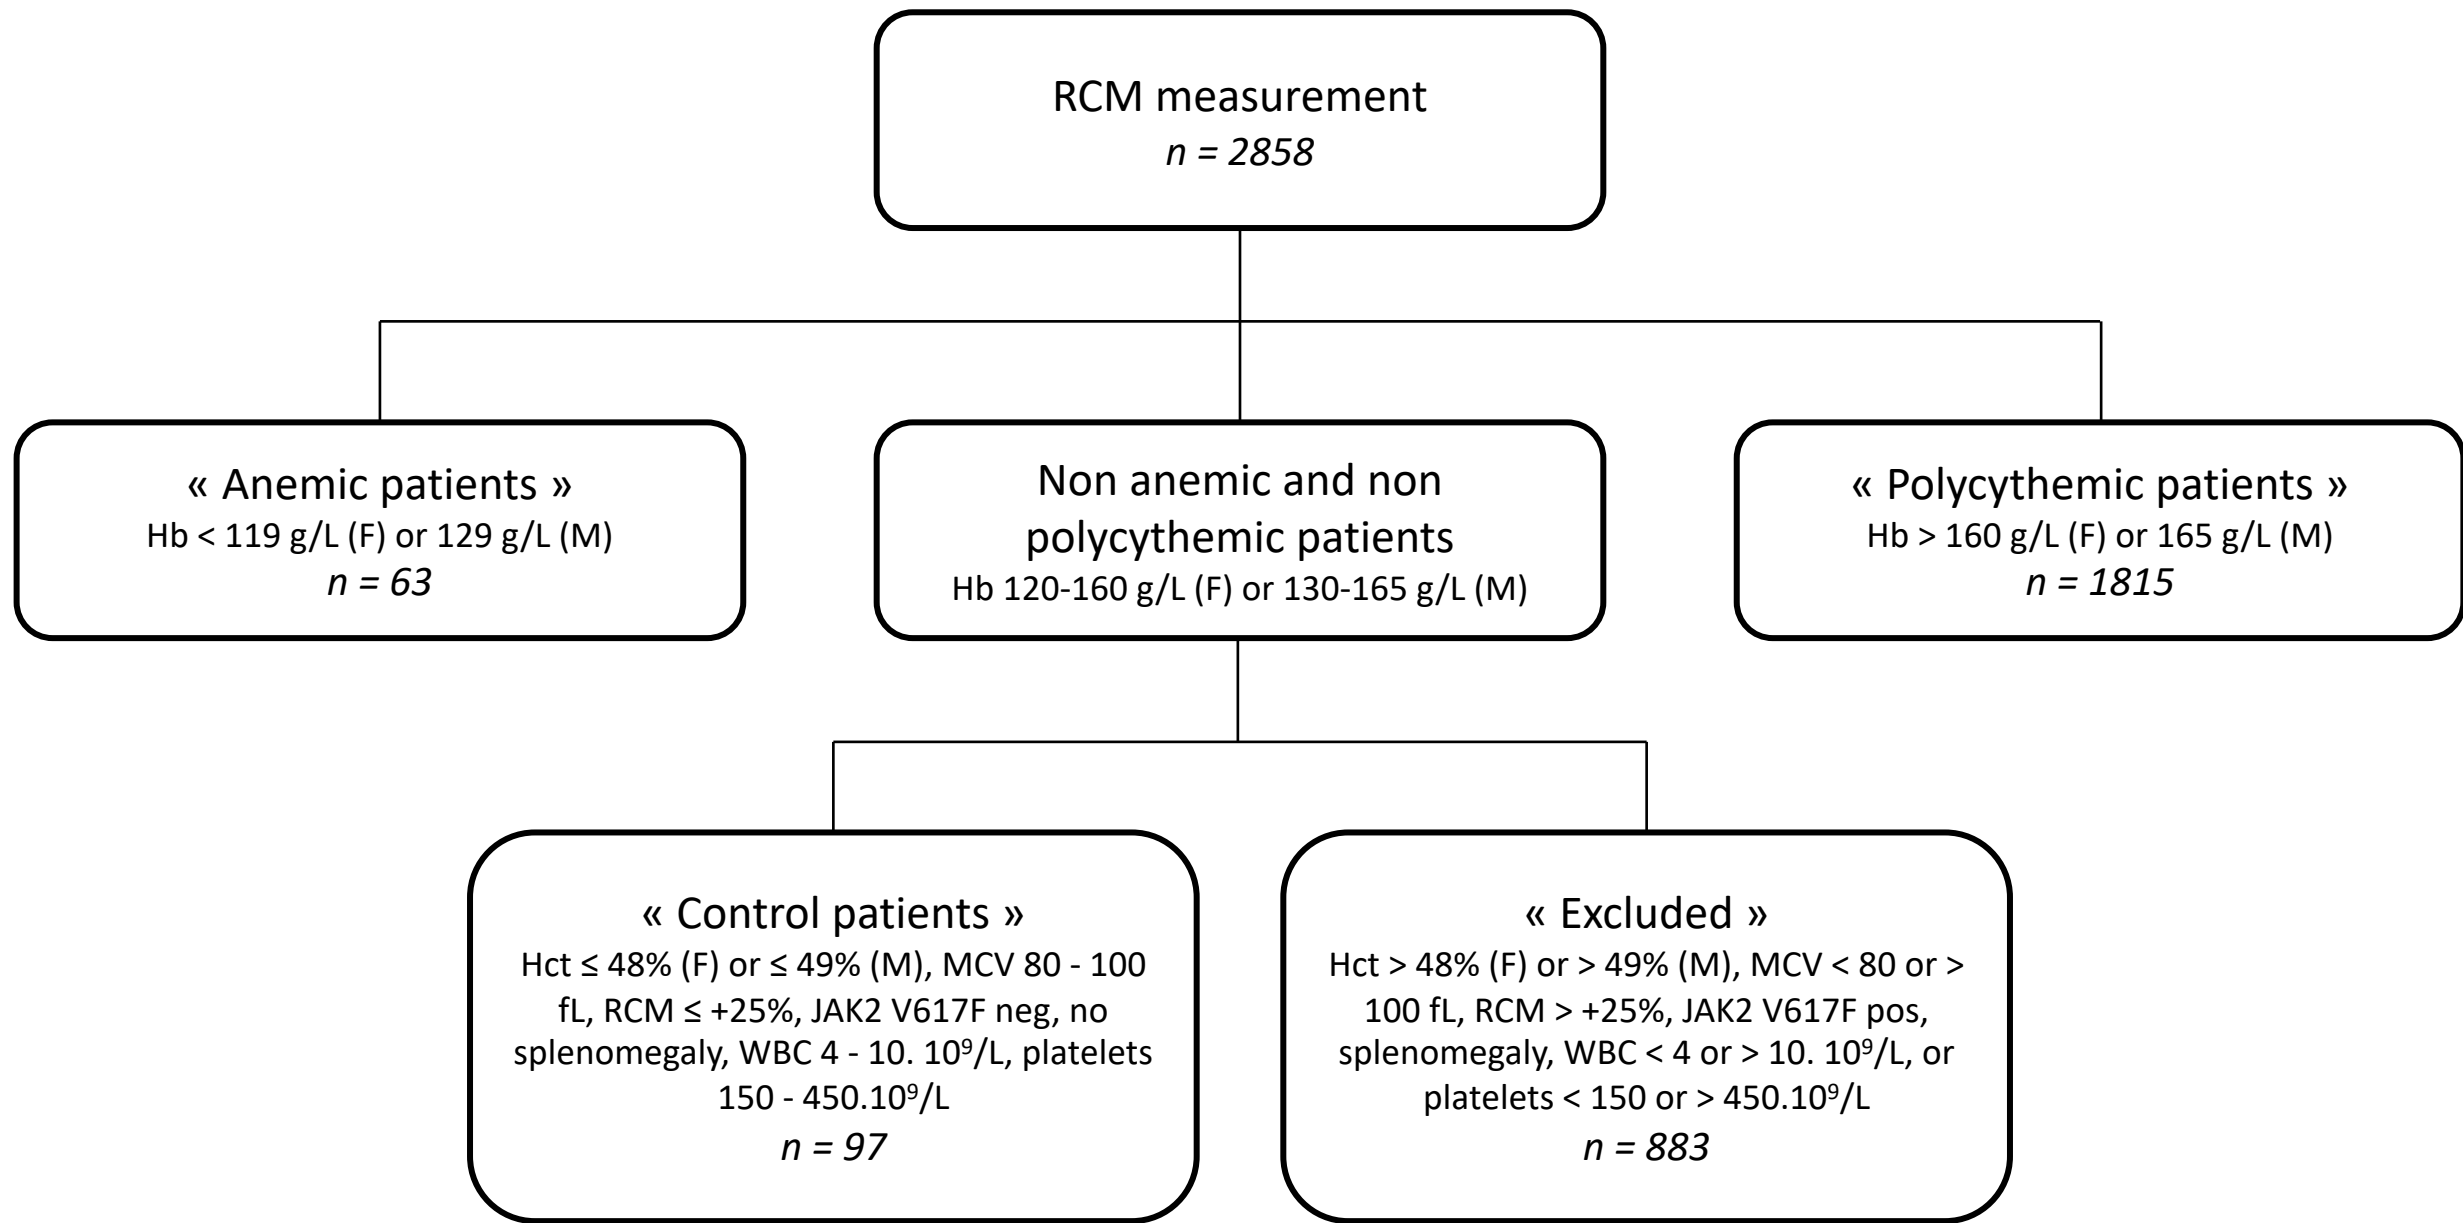

**Supplementary figure 1. Diagnostic Chart.**

The number of patients concerned in each step of the chart is noted next to each item (n).
